# Supplementary material for: Species History Masks the Effects of Human-Induced Range Loss – Unexpected Genetic Diversity in the Endangered Giant Mayfly Palingenia longicauda
Source: PLoS One. 2012 Mar 8;7(3):e31872. doi: 10.1371/journal.pone.0031872 (PMC3297596; doi:10.1371/journal.pone.0031872)
Supplement: Table S3 — Pairwise values (lower left) and significant ETPD (upper right) results of extant populations. The tests are calculated with combined mtCOI and 16S sequences (936 bp). values in bold are significant at . “+” ETPD values mark significant population differentiation at . (XLS) [file pone.0031872.s003.xls]

## Sheet: Sheet1
Species’ history masks the effects of human-induced range loss –
unexpected genetic diversity in the endangered giant mayfly Palingenia longicauda
Miklós Bálint, Kristóf Málnás, Carsten Nowak, Jutta Geismar, Éva Váncsa, László Polyák
Szabolcs Lengyel, Peter Haase
Supporting table S3. Pairwise Fst values (lower left) and significant ETPD (upper right) results of extant populations.
The tests are calculated with combined mtCOI and 16S sequences (936 bp).
Fst values in bold are significant at p < 0.05. "+" ETPD values mark significant population differentiation at p < 0.05.
	Tarpa	Gulács	Aranyosapáti	Tiszatardos	Zsurk	Cigánd	Szegi 1	Szegi 2	Poroszló	Szeghalom	Körösladány	Vécserdő	Algyő	Ferencszállás	Csongrád	Rum (Rába)
Tarpa		-	-	-	-	-	+	-	-	-	-	-	-	-	-	+
Gulács	-0.01668		-	+	-	-	+	+	-	+	-	-	-	-	-	+
Aranyosapáti	-0.02383	0.03263		-	-	-	+	-	-	-	-	-	-	-	-	+
Tiszatardos	0.03562	0.13212	0.01405		-	+	-	-	-	-	-	-	+	-	+	+
Zsurk	-0.01164	0.05755	-0.01643	-0.02839		-	-	-	-	-	-	-	-	-	-	+
Cigánd	-0.03697	-0.00267	-0.01173	0.03893	-0.02149		+	+	+	+	-	-	-	-	-	+
Szegi 1	0.26904	0.39167	0.22513	0.06098	0.1361	0.29065		-	-	+	-	+	+	+	+	+
Szegi 2	0.11171	0.24128	0.07671	-0.05319	-0.00758	0.12158	0.00092		-	-	-	+	+	+	+	+
Poroszló	-0.01372	0.02318	0.01069	0.02905	-0.02765	-0.03541	0.22182	0.07647		-	-	-	-	-	-	+
Szeghalom	0.04286	0.13432	0.02313	-0.03426	-0.0358	0.02385	0.09299	-0.03591	0.00011		-	-	-	-	-	+
Körösladány	-0.0165	0.04229	-0.0167	-0.00938	-0.03511	-0.02392	0.16573	0.03245	-0.01805	-0.01156		-	-	-	-	+
Vécserdő	-0.06022	-0.02798	-0.04502	0.04938	-0.00698	-0.0387	0.33829	0.14239	-0.00074	0.06467	-0.01478		-	-	-	+
Algyő	-0.05042	-0.02598	-0.02583	0.04586	-0.02698	-0.07041	0.34783	0.14761	-0.05415	0.03068	-0.03334	-0.06289		-	-	+
Ferencszállás	-0.04229	-0.014	-0.02574	0.05735	0.01235	-0.02366	0.3165	0.14986	0.01688	0.07574	-0.00193	-0.06725	-0.04216		-	+
Csongrád	-0.00075	-0.01126	0.03261	0.1593	0.08299	0.00614	0.45347	0.287	0.05433	0.16522	0.05559	-0.03679	-0.02564	-0.03072		+
Rum (Rába)	0.38908	0.48985	0.31797	0.26475	0.35134	0.4481	0.43003	0.32531	0.45333	0.36345	0.3401	0.40304	0.48535	0.37891	0.51202

## Sheet: Sheet2
		algyo	aranyosapati	cigand	csongrad	ferencszallas	igonya	korosladany	poroszlo	rum	szegi	tarpa	vecserd	vidratanya	zsurk	Szegi2	tiszatardos
1	algyo		-	-	-	-	-	-	-	+	+	-	-	-	-	+	+
2	aranyosapati	-		-	-	-	-	-	-	+	+	-	-	-	-	-	-
3	cigand	-	-		-	-	-	-	+	+	+	-	-	+	-	+	+
4	csongrad	-	-	-		-	-	-	-	+	+	-	-	-	-	+	+
5	ferencszallas	-	-	-	-		-	-	-	+	+	-	-	-	-	+	-
6	igonya	-	-	-	-	-		-	-	+	+	-	-	+	-	+	+
7	korosladany	-	-	-	-	-	-		-	+	-	-	-	-	-	-	-
8	poroszlo	-	-	+	-	-	-	-		+	-	-	-	-	-	-	-
9	rum	+	+	+	+	+	+	+	+		+	+	+	+	+	+	+
10	szegi	+	+	+	+	+	+	-	-	+		+	+	+	-	-	-
11	tarpa	-	-	-	-	-	-	-	-	+	+		-	-	-	-	-
12	vecserd	-	-	-	-	-	-	-	-	+	+	-		-	-	+	-
13	vidratanya	-	-	+	-	-	+	-	-	+	+	-	-		-	-	-
14	zsurk	-	-	-	-	-	-	-	-	+	-	-	-	-		-	-
15	Szegi2	+	-	+	+	+	+	-	-	+	-	-	+	-	-		-
16	tiszatardos	+	-	+	+	-	+	-	-	+	-	-	-	-	-	-
